# Supplementary material
Source: PubMed Central journal article supplement (PMC4522231)
Supplement: NIHMS696891-supplement-1.pdf [file NIHMS696891-supplement-1.pdf]

## Supplementary Tables and Figures

**Table S1.** Summary of 159 deregulated miRNAs for all, male, or female samples analyzed by ABIqPCR, RNU44, or global normalization (xls file).

**Table S2.** Target-genes of upstream regulators. 47 genes are targets of upstream regulators with activation/suppression prediction Z-scores > 2.0. 23 of these genes (marked in bold) also contribute to IPA Biofunctions with Z-scores > 2.0.

| Gene Symbol   | Gene Title                                                         | FC    |
|---------------|--------------------------------------------------------------------|-------|
| <b>TDGF1</b>  | teratocarcinoma-derived growth factor 1                            | 1.43  |
| STC2          | stanniocalcin 2                                                    | 1.34  |
| TMPRSS6       | transmembrane protease, serine 6                                   | 1.31  |
| <b>LGALS1</b> | lectin, galactoside-binding, soluble, 1                            | 1.28  |
| PAX6          | paired box 6                                                       | 1.27  |
| <b>ESRRA</b>  | estrogen-related receptor alpha                                    | 1.25  |
| <b>RARA</b>   | retinoic acid receptor, alpha                                      | 1.23  |
| <b>SMAD6</b>  | SMAD family member 6                                               | 1.23  |
| WNT5B         | wingless-type MMTV integration site family, member 5B              | 1.22  |
| DERL1         | derlin 1                                                           | -1.22 |
| <b>AKAP12</b> | A kinase (PRKA) anchor protein 12                                  | -1.22 |
| <b>BCL2L1</b> | BCL2-like 1                                                        | -1.23 |
| DPP6          | dipeptidyl-peptidase 6                                             | -1.25 |
| GOLGA3        | golgin A3                                                          | -1.26 |
| <b>IRS2</b>   | insulin receptor substrate 2                                       | -1.32 |
| QKI           | KH domain containing, RNA binding                                  | -1.32 |
| ALDOC         | aldolase C, fructose-bisphosphate                                  | -1.34 |
| <b>CTSB</b>   | cathepsin B                                                        | -1.36 |
| NRCAM         | neuronal cell adhesion molecule                                    | -1.36 |
| FXYD6         | FXYD domain containing ion transport regulator 6                   | -1.39 |
| <b>ABCC5</b>  | ATP-binding cassette, sub-family C (CFTR/MRP), member 5            | -1.41 |
| UQCR10        | ubiquinol-cytochrome c reductase, complex III subunit X            | -1.41 |
| GORASP2       | golgi reassembly stacking protein 2, 55kDa                         | -1.42 |
| PRUNE2        | prune homolog 2 (Drosophila)                                       | -1.45 |
| SERP1         | stress-associated endoplasmic reticulum protein 1                  | -1.56 |
| TACC1         | transforming, acidic coiled-coil containing protein 1              | -1.56 |
| ENO2          | enolase 2 (gamma, neuronal)                                        | -1.57 |
| <b>VAV3</b>   | vav 3 guanine nucleotide exchange factor                           | -1.61 |
| RTN1          | reticulon 1                                                        | -1.63 |
| SV2A          | synaptic vesicle glycoprotein 2A                                   | -1.64 |
| <b>L1CAM</b>  | L1 cell adhesion molecule                                          | -1.64 |
| GAPDH         | glyceraldehyde-3-phosphate dehydrogenase                           | -1.66 |
| ALDOA         | aldolase A, fructose-bisphosphate                                  | -1.79 |
| <b>DDX17</b>  | DEAD (Asp-Glu-Ala-Asp) box helicase 17                             | -1.82 |
| DDIT4         | DNA-damage-inducible transcript 4                                  | -1.86 |
| <b>CEBPB</b>  | CCAAT/enhancer binding protein (C/EBP), beta                       | -1.87 |
| <b>TFRC</b>   | transferrin receptor                                               | -1.89 |
| <b>FHL1</b>   | four and a half LIM domains 1                                      | -1.91 |
| <b>LDHA</b>   | lactate dehydrogenase A                                            | -1.96 |
| <b>HUWE1</b>  | HECT, UBA and WWE domain containing 1, E3 ubiquitin protein ligase | -1.98 |
| ARF4          | ADP-ribosylation factor 4                                          | -2.03 |
| VSNL1         | visinin-like 1                                                     | -2.42 |
| TNS1          | tensin 1                                                           | -2.46 |
| <b>LMO3</b>   | LIM domain only 3 (rhombotin-like 2)                               | -2.51 |
| <b>NEFL</b>   | neurofilament, light polypeptide                                   | -2.60 |
| <b>STXBP1</b> | syntaxin binding protein 1                                         | -2.96 |
| <b>CARS</b>   | cysteinyI-tRNA synthetase                                          | -4.05 |

**Table S3.** Down-regulated target-genes associated with up-regulated miRNAs and up-regulated targets associated with down-regulated miRNAs. Log2 FC are based on global normalization (see Table S1). FC with *p* values < 0.05 are marked in bold/italic and gray and those with *p* values > 0.05 but < 0.1 in bold/italic. For some miRNAs alternative miRNA IDs are used by the IPA software, which are indicated in brackets.

| upregulated miRNAs                | all         |                 | male        |                 | female      |                 | ABCC5 | AKAP12 | BCL2L1 | CARS | CEBPB | CTSB | DDX17 | FHL1 | HUWE1 | IRS2 | L1CAM | LDHA | LMO3 | NEFL | STXBP1 | TFRC | VAV3 | # Genes/miRNA |   |
|-----------------------------------|-------------|-----------------|-------------|-----------------|-------------|-----------------|-------|--------|--------|------|-------|------|-------|------|-------|------|-------|------|------|------|--------|------|------|---------------|---|
|                                   | Log2 FC     | <i>p</i> values | Log2 FC     | <i>p</i> values | Log2 FC     | <i>p</i> values |       |        |        |      |       |      |       |      |       |      |       |      |      |      |        |      |      |               |   |
| <i>hsa-let-7b (let-7a-5p)</i>     | <b>1.17</b> | <b>0.028</b>    | 0.42        | 0.14            | <b>2.37</b> | <b>0.04</b>     | 1     |        | 1      |      |       |      |       |      |       | 1    |       |      |      |      |        |      | 1    | 4             |   |
| hsa-miR-101                       | 0.57        | 0.291           |             |                 |             |                 | 1     |        |        |      |       |      |       |      |       |      |       |      | 1    |      |        |      |      | 2             |   |
| hsa-miR-105                       | 0.85        | 0.255           |             |                 |             |                 |       |        |        |      |       |      | 1     | 1    |       |      |       |      |      |      |        |      |      | 2             |   |
| <i>hsa-miR-106a (miR-17-5p)</i>   | <b>0.91</b> | <b>0.005</b>    | <b>0.87</b> | <b>0.04</b>     | <b>1.31</b> | <b>0.02</b>     |       |        |        |      |       |      |       |      |       |      |       |      | 1    |      |        |      |      | 1             |   |
| hsa-miR-124                       | 0.78        | 0.193           | <b>1.48</b> | <b>0.08</b>     |             |                 |       |        |        |      |       |      |       |      |       |      |       |      | 1    |      |        | 1    |      | 2             |   |
| hsa-miR-125b                      | 0.24        | 0.253           |             |                 |             |                 | 1     |        |        |      |       |      |       |      |       |      |       |      |      |      |        |      | 1    | 2             |   |
| <i>hsa-miR-126</i>                | <b>1.59</b> | <b>0.087</b>    | 1.05        | 0.11            |             |                 |       |        |        |      | 1     |      |       |      |       |      |       |      |      |      |        |      |      | 1             |   |
| hsa-miR-128                       | 0.23        | 0.326           | 0.62        | 0.13            |             |                 |       |        |        |      |       |      |       |      |       |      |       |      |      |      |        |      | 1    | 1             |   |
| <i>hsa-miR-132</i>                | <b>0.74</b> | <b>0.054</b>    |             |                 |             |                 |       |        |        |      |       |      |       |      |       |      |       |      |      |      | 1      |      |      | 1             |   |
| hsa-miR-133a                      | 0.38        | 0.381           |             |                 |             |                 |       |        | 1      |      |       |      |       |      |       |      |       |      |      |      | 1      |      |      | 2             |   |
| <i>hsa-miR-135a (miR-135a-5p)</i> | <b>1.95</b> | <b>0.001</b>    | <b>1.76</b> | <b>0.00</b>     |             |                 |       |        |        |      |       |      |       |      |       | 1    |       |      |      |      |        |      |      | 1             |   |
| <i>hsa-miR-140-5p</i>             | <b>0.44</b> | <b>0.095</b>    | 0.42        | 0.17            |             |                 |       | 1      |        |      | 1     |      |       |      |       |      |       |      |      |      |        |      | 1    | 3             |   |
| <i>hsa-miR-142-3p</i>             | <b>1.00</b> | <b>0.085</b>    | <b>1.99</b> | <b>0.00</b>     |             |                 |       | 1      |        |      |       |      |       |      |       |      |       |      | 1    |      |        |      |      | 2             |   |
| <i>hsa-miR-143</i>                | <b>1.00</b> | <b>0.089</b>    | <b>1.70</b> | <b>0.04</b>     |             |                 |       |        |        |      |       |      |       |      |       |      |       |      | 1    |      | 1      |      |      | 1             |   |
| <i>hsa-miR-145 (miR-145-5p)</i>   | <b>0.75</b> | <b>0.046</b>    | <b>0.89</b> | <b>0.09</b>     |             |                 | 1     |        |        |      |       |      | 1     |      | 1     |      |       |      |      |      |        | 1    |      | 4             |   |
| <i>hsa-miR-148a (miR-148a-3p)</i> | <b>2.05</b> | <b>0.014</b>    | <b>2.68</b> | <b>0.00</b>     |             |                 |       |        |        |      |       |      |       |      |       |      |       |      |      | 1    | 1      |      |      | 2             |   |
| hsa-miR-150                       | 1.80        | 0.142           |             |                 |             |                 |       |        |        |      |       |      |       |      |       |      |       |      |      |      |        |      |      |               | 1 |
| <i>hsa-miR-16</i>                 | <b>1.97</b> | <b>0.084</b>    | <b>1.31</b> | <b>0.09</b>     |             |                 | 1     |        |        |      |       |      |       |      | 1     |      |       |      |      |      | 1      |      |      | 3             |   |
| <i>hsa-miR-181a</i>               | <b>0.60</b> | <b>0.079</b>    | 0.66        | 0.12            |             |                 |       |        |        |      |       |      |       |      | 1     | 1    | 1     |      | 1    |      |        | 1    |      | 4             |   |
| <i>hsa-miR-184</i>                | <b>3.05</b> | <b>0.086</b>    | 0.90        | 0.19            |             |                 |       | 1      |        |      |       |      |       |      | 1     |      |       |      |      |      |        | 1    |      | 2             |   |
| hsa-miR-186                       | 1.45        | 0.136           |             |                 |             |                 | 1     |        |        |      |       |      |       |      |       |      |       |      | 1    |      |        |      |      | 2             |   |
| hsa-miR-191                       | 0.69        | 0.291           |             |                 |             |                 |       |        |        | 1    |       |      |       |      |       |      |       |      |      |      |        |      |      | 1             |   |
| hsa-miR-193b                      | 0.26        | 0.289           |             |                 |             |                 |       |        |        |      |       |      |       |      |       |      |       |      |      |      |        |      | 1    | 2             |   |
| hsa-miR-21                        | 0.43        | 0.322           | <b>0.98</b> | <b>0.08</b>     |             |                 | 1     |        |        |      |       |      |       |      |       |      |       |      |      |      |        |      | 1    | 1             |   |
| <i>hsa-miR-218</i>                | <b>0.52</b> | <b>0.085</b>    |             |                 |             |                 |       |        |        |      | 1     |      |       |      |       |      |       |      |      |      | 1      |      |      | 4             |   |
| hsa-miR-219-5p                    | 0.49        | 0.200           | <b>0.95</b> | <b>0.07</b>     |             |                 | 1     |        |        |      |       |      |       |      |       |      |       |      | 1    |      |        |      | 1    | 2             |   |
| <i>hsa-miR-223 (miR-223-3p)</i>   | <b>1.05</b> | <b>0.025</b>    | <b>0.98</b> | <b>0.02</b>     |             |                 |       |        |        |      |       |      | 1     |      |       |      |       |      |      |      |        |      | 1    | 2             |   |
| <i>hsa-miR-24</i>                 | <b>0.81</b> | <b>0.096</b>    | <b>0.55</b> | <b>0.06</b>     |             |                 |       |        |        |      | 1     |      |       |      |       |      |       |      |      |      |        |      | 1    | 1             |   |
| <i>hsa-miR-26a (miR-26a-5p)</i>   | <b>0.93</b> | <b>0.001</b>    | <b>0.98</b> | <b>0.01</b>     |             |                 |       |        |        |      |       |      | 1     |      | 1     |      |       |      |      |      |        |      |      | 2             |   |
| <i>hsa-miR-27a</i>                | <b>1.59</b> | <b>0.054</b>    | <b>1.92</b> | <b>0.06</b>     |             |                 |       |        |        |      |       |      |       |      |       |      |       |      |      |      |        |      | 1    | 1             |   |
| <i>hsa-miR-28-5p (miR-708-5p)</i> | <b>1.90</b> | <b>0.029</b>    | <b>1.98</b> | <b>0.01</b>     |             |                 |       |        |        |      |       |      |       |      |       |      |       |      |      |      |        |      | 1    | 1             |   |
| <i>hsa-miR-30b</i>                | <b>0.30</b> | <b>0.073</b>    |             |                 |             |                 |       |        | 1      |      |       |      |       |      |       | 1    |       |      |      | 1    | 1      |      | 1    | 5             |   |
| hsa-miR-320                       | 1.48        | 0.115           | 0.32        | 0.24            |             |                 |       |        |        |      | 1     |      |       |      |       |      |       |      | 1    |      |        |      |      | 2             |   |
| hsa-miR-324-3p                    | 0.88        | 0.138           | 0.21        | 0.40            |             |                 |       |        |        |      |       |      |       |      |       |      |       | 1    |      |      |        |      |      | 1             |   |
| hsa-miR-330-3p                    | 0.47        | 0.150           |             |                 |             |                 |       |        |        |      |       |      |       |      |       |      |       |      |      | 1    |        |      |      | 1             |   |
| hsa-miR-331-3p                    | 0.07        | 0.416           |             |                 |             |                 |       |        |        |      |       |      |       |      |       |      |       |      |      |      | 1      |      |      | 3             |   |
| <i>hsa-miR-335 (miR-335-3p)</i>   | <b>1.07</b> | <b>0.044</b>    | <b>1.04</b> | <b>0.10</b>     |             |                 |       |        |        |      |       |      | 1     |      |       |      |       |      |      |      |        |      |      | 1             |   |
| hsa-miR-338-3p                    | 0.08        | 0.468           |             |                 |             |                 | 1     |        |        |      |       |      |       |      |       | 1    |       | 1    |      |      |        | 1    | 1    | 6             |   |
| hsa-miR-342-3p                    | 0.60        | 0.292           |             |                 |             |                 |       | 1      |        |      |       |      |       |      |       |      |       |      |      |      |        |      |      | 1             |   |
| hsa-miR-34a                       | 0.09        | 0.437           |             |                 |             |                 |       |        |        |      |       |      |       |      |       |      |       | 1    |      |      |        |      |      | 2             |   |
| <i>hsa-miR-374a (miR-374b-5p)</i> | <b>0.72</b> | <b>0.019</b>    | <b>0.58</b> | <b>0.08</b>     |             |                 |       |        |        |      | 1     |      |       |      |       |      |       | 1    |      |      |        |      |      | 2             |   |
| hsa-miR-411                       | 0.78        | 0.163           |             |                 |             |                 |       |        |        |      |       | 1    |       |      |       |      |       |      |      |      |        |      |      | 1             |   |
| hsa-miR-455-5p                    | 1.55        | 0.109           | 1.90        | 0.13            |             |                 |       |        |        |      |       |      |       |      |       |      |       |      |      |      |        |      |      | 2             |   |
| hsa-miR-494                       | 0.05        | 0.463           |             |                 |             |                 | 1     |        |        |      |       |      |       |      |       |      |       |      |      |      |        |      |      | 1             |   |
| hsa-miR-495                       | 0.13        | 0.346           |             |                 |             |                 |       |        | 1      |      |       |      |       |      |       |      |       |      |      |      |        |      |      | 1             |   |
| <i>hsa-miR-520d-5p</i>            | <b>1.56</b> | <b>0.062</b>    | 0.67        | 0.28            | <b>1.91</b> | <b>0.07</b>     |       |        |        |      |       |      |       |      |       |      |       |      |      |      |        |      | 1    | 2             |   |
| hsa-miR-574-3p                    | 2.08        | 0.126           |             |                 |             |                 |       |        |        |      |       |      |       | 1    |       |      |       |      |      |      |        |      |      | 1             |   |
| hsa-miR-655                       | 0.07        | 0.435           |             |                 |             |                 |       |        |        | 1    |       |      |       |      |       |      |       |      |      |      |        |      |      | 2             |   |
| hsa-miR-885-5p                    | 0.00        | 0.499           |             |                 |             |                 |       |        |        |      |       |      |       |      |       |      |       |      |      |      |        |      |      | 1             |   |
| <i>hsa-miR-9</i>                  | <b>0.26</b> | <b>0.098</b>    |             |                 |             |                 |       |        |        |      |       |      | 1     |      |       |      |       |      |      | 1    | 1      | 1    | 1    | 5             |   |
| <i>hsa-miR-92a (miR-92a-3p)</i>   | <b>0.86</b> | <b>0.024</b>    | <b>1.09</b> | <b>0.03</b>     |             |                 |       |        |        |      |       |      |       |      |       | 1    |       |      |      | 1    |        |      |      | 2             |   |
| <i>hsa-miR-95</i>                 | <b>0.81</b> | <b>0.036</b>    |             |                 | <b>1.31</b> | <b>0.04</b>     |       |        |        |      |       |      |       |      |       |      |       |      |      |      |        |      |      | 1             |   |
| # miRNAs/Gene                     |             |                 |             |                 |             |                 | 4     | 8      | 8      | 1    | 4     | 7    | 6     | 3    | 2     | 9    | 4     | 2    | 10   | 5    | 9      | 9    | 12   |               |   |

| downregulated miRNAs  | all          |                 | male         |                 | female  |                 | ESRRA | RARA | SMAD6 | TDGF1 | # Genes/miRNA |
|-----------------------|--------------|-----------------|--------------|-----------------|---------|-----------------|-------|------|-------|-------|---------------|
|                       | Log2 FC      | <i>p</i> values | Log2 FC      | <i>p</i> values | Log2 FC | <i>p</i> values |       |      |       |       |               |
| hsa-miR-134           | -0.72        | 0.264           |              |                 |         |                 |       |      | 1     |       | 1             |
| hsa-miR-138           | -0.21        | 0.321           |              |                 |         |                 |       | 1    |       |       | 1             |
| hsa-miR-328           | -0.13        | 0.365           |              |                 |         |                 | 1     |      |       |       | 1             |
| hsa-miR-410           | -0.43        | 0.246           | <b>-0.67</b> | <b>0.05</b>     |         |                 |       |      | 1     |       | 1             |
| <i>hsa-miR-532-5p</i> | <b>-1.36</b> | <b>0.046</b>    |              |                 | -1.33   | 0.21            |       |      |       | 1     | 1             |
| hsa-miR-660           | -0.04        | 0.486           |              |                 |         |                 |       |      |       | 1     | 1             |
| <i>hsa-miR-744</i>    | <b>-0.73</b> | <b>0.017</b>    |              |                 |         |                 |       |      | 1     |       | 1             |
| hsa-miR-889           | -0.21        | 0.420           | <b>-1.73</b> | <b>0.03</b>     |         |                 |       |      |       | 1     | 1             |
| # miRNAs/Gene         |              |                 |              |                 |         |                 | 1     | 2    | 3     | 2     |               |
